# Supplementary material
Source: PubMed Central journal article supplement (PMC2141878)

$u_{Dean}$  (m/s)

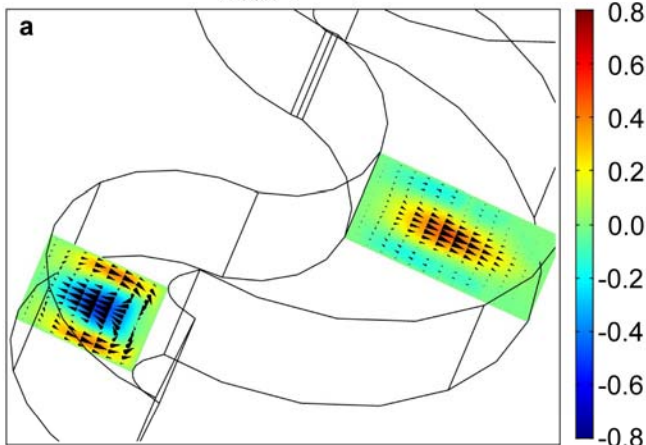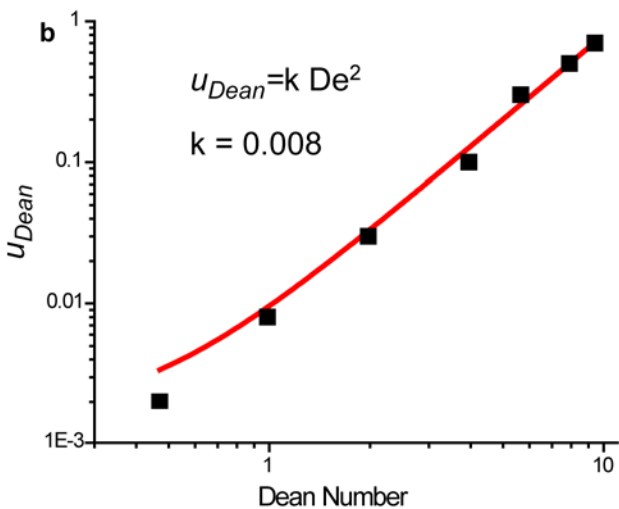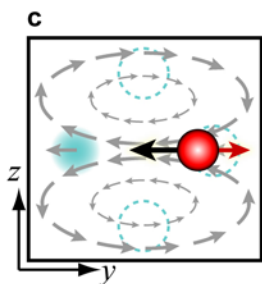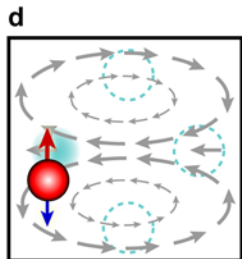

$F_{drag \text{ midline}} > F_{shear} > F_{drag \text{ split}}$

Supplement: pnas_0704958104_1.pdf [file pnas_0704958104_1.pdf]

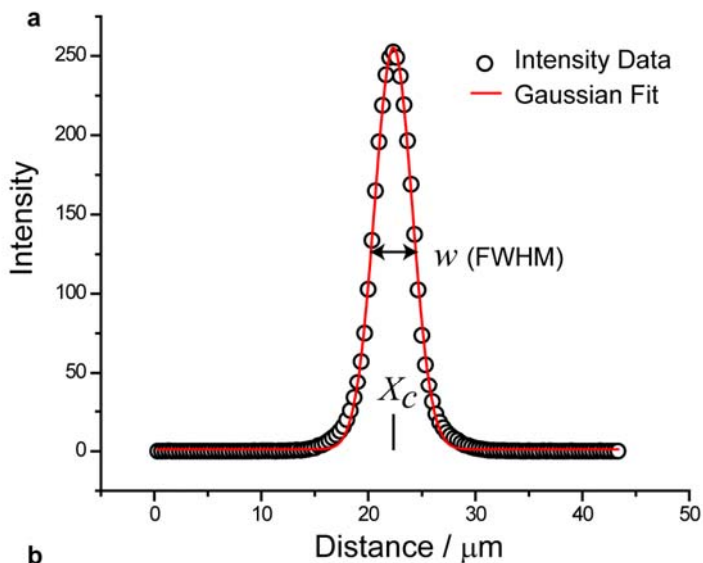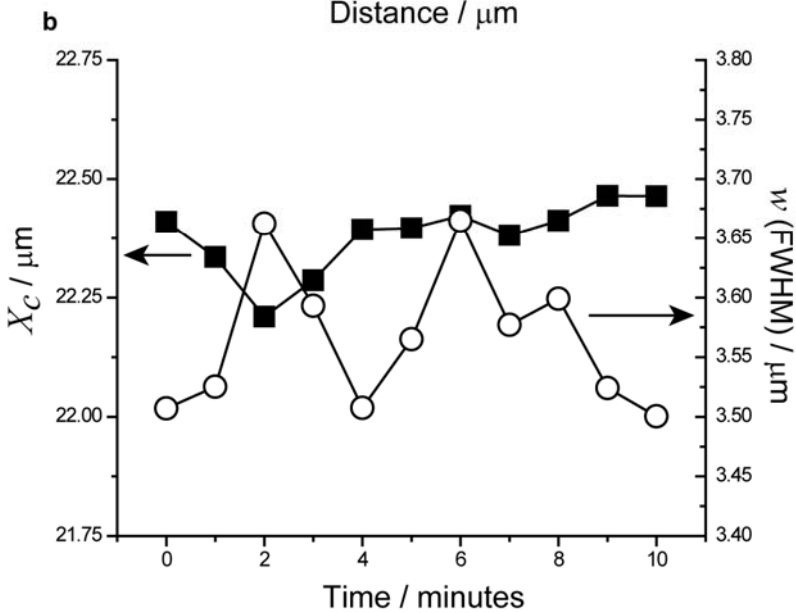

Supplement: pnas_0704958104_2.pdf [file pnas_0704958104_2.pdf]

**a**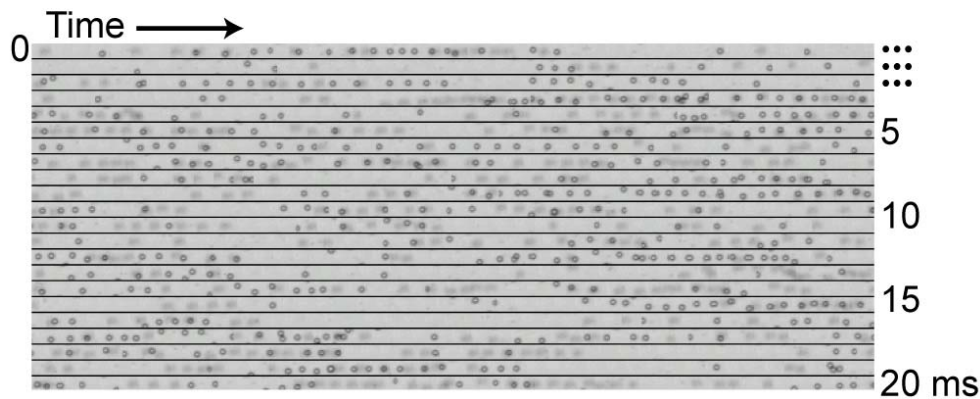**b**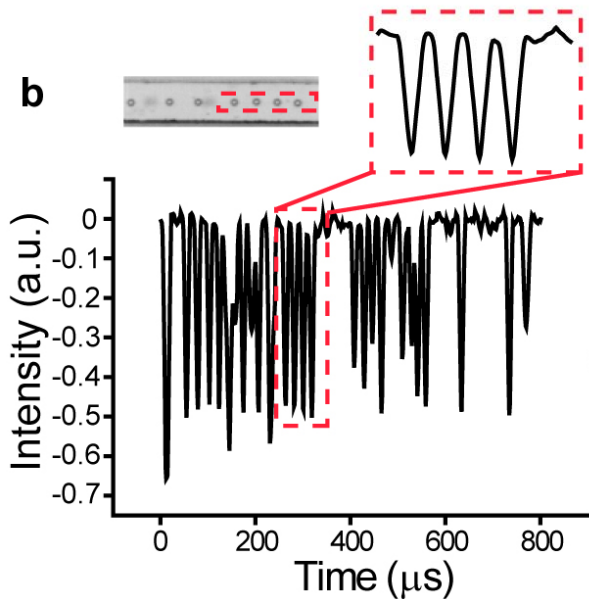**c**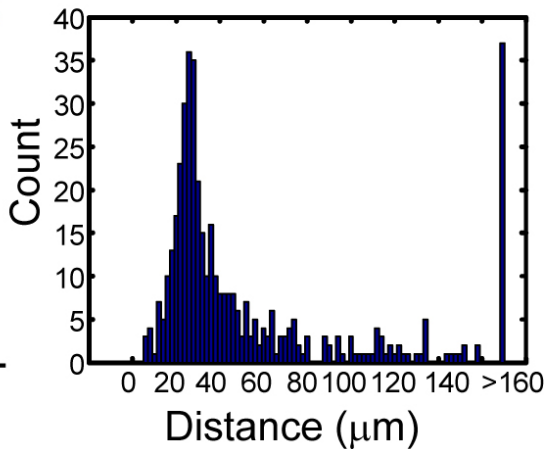

Supplement: pnas_0704958104_3.pdf [file pnas_0704958104_3.pdf]

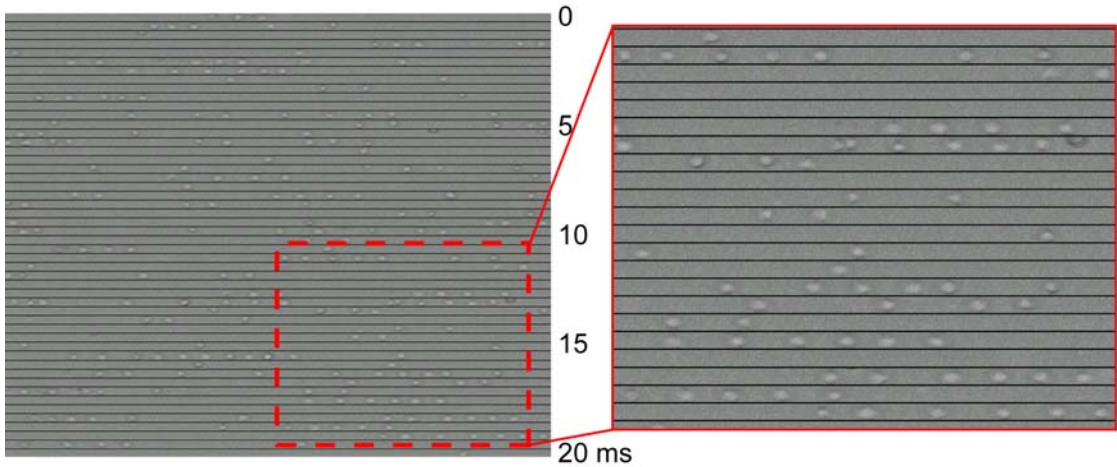

Supplement: pnas_0704958104_4.pdf [file pnas_0704958104_4.pdf]

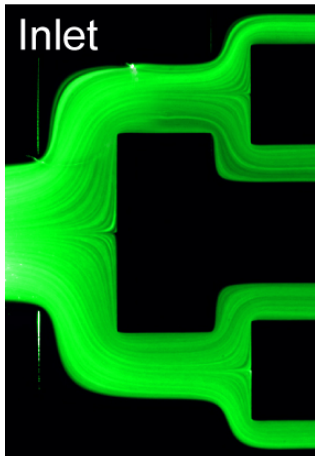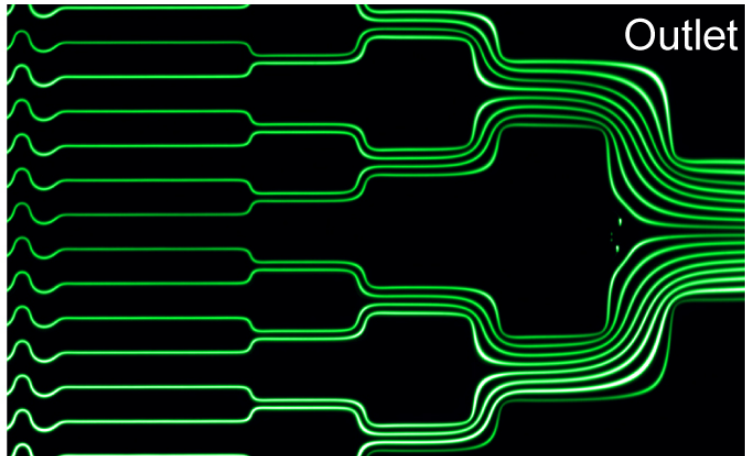

Supplement: pnas_0704958104_5.pdf [file pnas_0704958104_5.pdf]

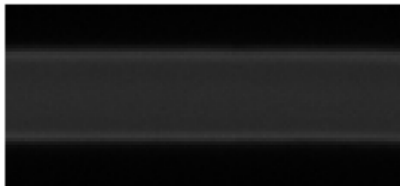

$R_p = 0.24$

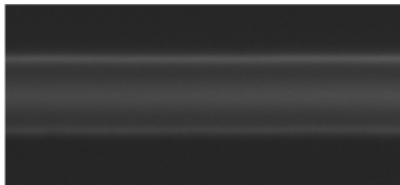

0.96

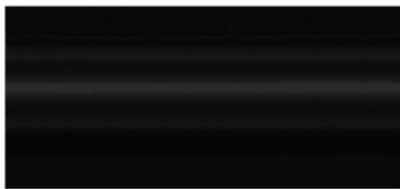

2.94

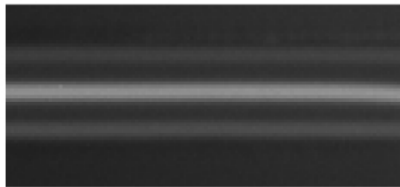

4.86

Supplement: pnas_0704958104_6.pdf [file pnas_0704958104_6.pdf]

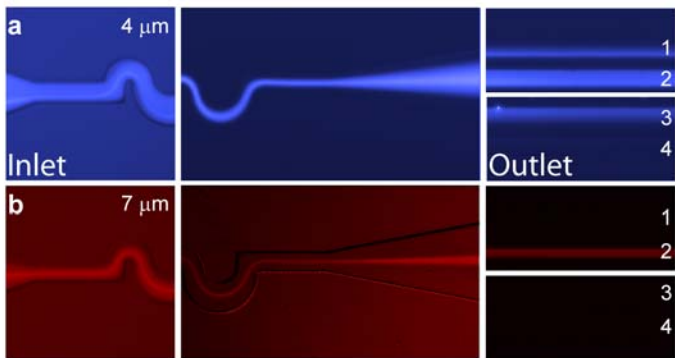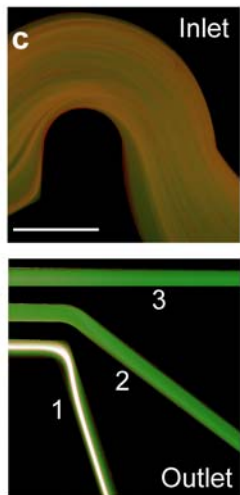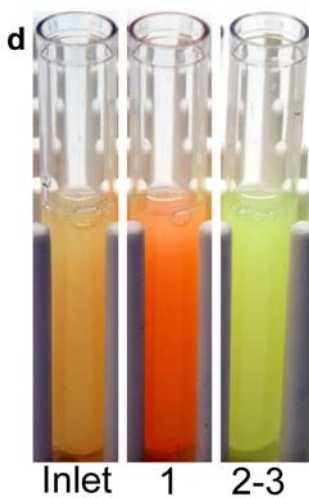

Supplement: pnas_0704958104_7.pdf [file pnas_0704958104_7.pdf]
